# Supplementary material for: Host gene response to endosymbiont and pathogen in the cereal weevil Sitophilus oryzae
Source: Springer Nature journal article supplement (doi:10.1186/1471-2180-12-s1-s14), 2012-01-18
Supplement: 12866_2012_1559_MOESM1_ESM.pdf [file 12866_2012_1559_MOESM1_ESM.pdf]

## Additional file 1 – Primers used for transcriptomic study

| qRT-PCR Primers     | Sequence (5'-3')      | T°C<br>(4GC+2AT) |
|---------------------|-----------------------|------------------|
| For-MEGwB           | GCCAAAACCAAAGCCACTTA  | 58               |
| Rev-MEGwB           | TGTCGGGACTCCTTTCTTTG  | 60               |
| For-Hrs             | AGTCAGAGGCTGAAGCCAAG  | 62               |
| Rev-Hrs             | GATGGAGCTGAAGGGCTAGT  | 62               |
| For-coleoptericin-A | GAATAGATACAACGGGGGTCA | 62               |
| Rev-coleoptericin-A | CTACCATCTGACACTTCTC   | 60               |
| For-coleoptericin-B | CAGTTACATTTGCCCCCTA   | 60               |
| Rev-coleoptericin-B | GGCTGCTGGGTCTCTAATA   | 62               |
| For-SNARE           | CCCTGACTGCGGATATCACT  | 62               |
| Rev-SNARE           | TAATCGCTTCAATTCAGCCC  | 58               |
| For-Rab7            | TCGAGGAGCAGACTGTTGTG  | 62               |
| Rev-Rab7            | GCCCTTTTTGCACTGATAGC  | 60               |
| For-Peroxiectin     | GAGCTTTTTGCGGTTGAAG   | 58               |
| Rev-Peroxiectin     | GTCCTTGCCATTTGTTCTGTT | 58               |
| For-TCTP            | AGTCAGCTCTTCACGGAGGT  | 62               |
| Rev-TCTP            | TGGCCCCATCAAGTAAATC   | 58               |
| For-Leonardo 14-3-3 | GCTTAGGGAGATATGCGACG  | 62               |
| Rev-Leonardo 14-3-3 | ACTGCATTTTTGGACTTGGC  | 58               |
| For-Hopscotch       | ACAGTTTACCGGTACCAGCG  | 62               |
| Rev-Hopscotch       | TACTTGTTGCTCCTGCCCTT  | 60               |
| For-c-type lectin   | ATAGCCGTAGTTGCCACACC  | 62               |
| Rev-c-type lectin   | ACAAAGATTCCTGCCATCCA  | 58               |
| For-Calmodulin1     | GGTAACGGAACGATCGACTT  | 62               |
| Rev-Calmodulin1     | CCTGATCATCTCGTCCACCT  | 60               |
| For-FK506BP         | ATTAATCCCGGAGACGGTTC  | 60               |
| Rev-FK506BP         | CGAACTCATCTGGGCTAC    | 60               |
| For-C-type lysozyme | TCCTTGACCAGTTAGGCAC   | 62               |
| Rev-C-type lysozyme | TGCGCACTTTATGTCTCCA   | 56               |
| For-cactus          | GGCGACGAGAATATCCTGAG  | 62               |
| Rev-cactus          | CATCTCTCTCGTCTTCGC    | 62               |
| For-GNBP1           | CTGGATTTAACTCGCCAAGA  | 58               |
| Rev-GNBP1           | ACTGTCTTTCCAAGAGGGCA  | 60               |

| qRT-PCR Primers | Sequence (5'-3')       | T°C<br>(4GC+2AT) |
|-----------------|------------------------|------------------|
| For-IAP3        | TCATGACAAAGGGACAATGC   | 58               |
| Rev-IAP3        | TGAAAACCTTCGATTCCTGG   | 58               |
| For-Imd         | ACAGGAGCAGTTTTTCGTTCCG | 60               |
| Rev-Imd         | GTTCAACCTTTGGGGTCC     | 58               |
| For-Ras         | AATTGGTTGTTGTGGGTGCT   | 58               |
| Rev-Ras         | TGATCACGCATTGCACTGT    | 56               |
| For-caspase     | TCCAGGAACGACATCATTTG   | 60               |
| Rev-Caspase     | TCGGCACTGTAATCCGTACA   | 60               |
| For-ECSIT       | TTTTCCACACGTCTGCGTTA   | 58               |
| Rev-ECSIT       | CTGAACTCCGAACTCTTCCG   | 62               |
| For-MnSOD       | ATGATTATGCCGCTTTGGAG   | 58               |
| Rev-MnSOD       | TTAATGTGTCCCCACCATT    | 58               |
| For-IAP2        | GGACAATGCAGAGCAGACAA   | 60               |
| Rev-IAP2        | GCGTCTGGTTGAGAATAGC    | 58               |
| For-gapdh       | AACTTTGCCGACAGCCTTGG   | 62               |
| Rev-gapdh       | GCGCCCATGTATGTAGTTGG   | 62               |
| For-RPL29       | TGGCCAAGTCCAAGAATCACA  | 62               |
| Rev-RPL29       | TTCTTGGCGCTAGCTTGCTT   | 62               |
| For-diptericin  | CTCCGATTTCAAGCCGACAG   | 62               |
| Rev-diptericin  | GGACCGTTTGACCATACTGG   | 62               |
| For-cecropin    | GTCCTGTTAGTTGTGGCAGTA  | 62               |
| Rev-cecropin    | TTATCTTCCAGGCACCAATCC  | 62               |
| For-sarcotoxin  | AGTCACAAAGGAACAATTTTGG | 60               |
| Rev-sarcotoxin  | AGAAGCCGTACGTCCTGTTCC  | 64               |
| For-wPGRP2      | TGCAAGGCCTGCCCTTAGT    | 60               |
| Rev-wPGRP2      | GTGCCATCTCCTCCAATCAT   | 60               |
| For-wPGRP3      | TTATGAAGGAGCTGGATGGC   | 60               |
| Rev-wPGRP3      | TAAGTTGCCGACCTCCAAAC   | 60               |
| For-Tollip      | AAGAGCGACGCAATAGGGT    | 58               |
| Rev-Tollip      | CATTAGGGTCCGTAGGTGT    | 58               |
