# Supplementary material for: Host gene response to endosymbiont and pathogen in the cereal weevil Sitophilus oryzae
Source: Springer Nature journal article supplement (doi:10.1186/1471-2180-12-s1-s14), 2012-01-18
Supplement: 12866_2012_1559_MOESM2_ESM.pdf [file 12866_2012_1559_MOESM2_ESM.pdf]

## Additional file 2 – Results of functional enrichment on SSHA and SSHB

### SSHA vs. SO

| <b>Biological process</b> |                                   |          |                  |
|---------------------------|-----------------------------------|----------|------------------|
| Level                     | GO terms                          | p-value  | Adjusted p-value |
| 3                         | transposition (GO:0032196)        | 1.60E-04 | 0.0114           |
|                           | cell division (GO:0051301)        | 1.42E-03 | 0.0504           |
| 6                         | DNA recombination (GO:0006310)    | 1.60E-04 | 0.0696           |
| <b>Molecular function</b> |                                   |          |                  |
| 3                         | transposase activity (GO:0004803) | 1.50E-04 | 0.0124           |

### SSHB vs. SO

| <b>Biological process</b> |                                                                   |          |                  |
|---------------------------|-------------------------------------------------------------------|----------|------------------|
| Level                     | GO terms                                                          | p-value  | Adjusted p-value |
| 3                         | digestion (GO:0007586)                                            | 5.40E-04 | 0.0381           |
|                           | nitrogen compound metabolic process (GO:0006807)                  | 0.018    | 0.0383           |
| 4                         | carbohydrate metabolic process (GO:0005975)                       | 2.60E-06 | 4.40E-04         |
| 5                         | polysaccharide metabolic process (GO:0005976)                     | 1.40E-04 | 3.41E-03         |
|                           | energy derivation by oxidation of organic compounds (GO:0015980)  | 2.50E-04 | 0.0405           |
| <b>Molecular function</b> |                                                                   |          |                  |
| 3                         | hydrolase activity (GO:0016787)                                   | 1.90E-10 | 1.60E-08         |
|                           | ion binding (GO:0043167)                                          | 2.20E-04 | 7.05E-03         |
|                           | tetrapyrole binding (GO:0046906)                                  | 2.50E-04 | 7.05E-03         |
| 4                         | hydrolase activity. acting on glycosyl bonds (GO:0016798)         | 2.80E-05 | 4.99E-03         |
|                           | monooxygenase activity (GO:0004497)                               | 7.30E-05 | 6.55E-03         |
|                           | peptidase activity (GO:0008233)                                   | 1.70E-04 | 0.14             |
|                           | heme binding (GO:0020037)                                         | 0.011    | 0.0453           |
|                           | cation binding (GO:0043169)                                       | 2.60E-03 | 0.093            |
| 5                         | hydrolase activity. hydrolyzing O-glycosyl compounds (GO:0004553) | 6.40E-05 | 0.0188           |
