# Supplementary material for: Host gene response to endosymbiont and pathogen in the cereal weevil Sitophilus oryzae
Source: Springer Nature journal article supplement (doi:10.1186/1471-2180-12-s1-s14), 2012-01-18
Supplement: 12866_2012_1559_MOESM3_ESM.pdf [file 12866_2012_1559_MOESM3_ESM.pdf]

**Additional file 3 – Eukaryotic sequences generated in SSHA**

| Accession numbers                                                              | #ESTs | Length (pb) | description                                                                                | Species                        | Accession    | Coverage | e-value   | Max identity |
|--------------------------------------------------------------------------------|-------|-------------|--------------------------------------------------------------------------------------------|--------------------------------|--------------|----------|-----------|--------------|
| FQ859854, FQ859644                                                             | 2     | 288         | similar to scavenger receptor class B (AGAP005716-PA)                                      | <i>Tribolium castaneum</i>     | XP_970008    | 46%      | 0.028     | 37%          |
| FQ859499, FQ859446                                                             | 2     | 194         | NA                                                                                         | NA                             | NA           | NA       | NA        | NA           |
| FQ859780, FQ859427                                                             | 2     | 150         | NA                                                                                         | NA                             | NA           | NA       | NA        | NA           |
| FQ859273, FQ859248                                                             | 2     | 164         | similar to 6-phosphogluconate dehydrogenase                                                | <i>Tribolium castaneum</i>     | XP_972051    | 96%      | 3.00E-18  | 81%          |
| FQ859351, FQ859330                                                             | 2     | 437         | calmodulin-1                                                                               | <i>Trichinella spiralis</i>    | EFV60806     | 61%      | 1.00E-44  | 100%         |
| FQ859529, FQ859251                                                             | 2     | 410         | calmodulin-1                                                                               | <i>Trichinella spiralis</i>    | EFV60806     | 91%      | 1.00E-63  | 100%         |
| FQ859762, FQ859397                                                             | 2     | 384         | similar to mitochondrial intermembrane space import and assembly protein 40                | <i>Tribolium castaneum</i>     | XP_967514    | 89%      | 9.00E-43  | 73%          |
| FQ859589, FQ859345                                                             | 2     | 347         | tubulin alpha-1 chain                                                                      | <i>Trichinella spiralis</i>    | EFV54402     | 99%      | 3.00E-58  | 99%          |
| FQ859824, FQ859776, FQ859840                                                   | 3     | 676         | similar to AGAP003323-PA Kinesin 2C                                                        | <i>Tribolium castaneum</i>     | XP_971861    | 10%      | 0.022     | 75%          |
| FQ859795, FQ859681, FQ859724, FQ859382, FQ859461, FQ859671, FQ859368           | 7     | 397         | similar to Transmembrane protein 41B                                                       | <i>Tribolium castaneum</i>     | XP_975236    | 32%      | 0.53      | 43%          |
| FQ859737, FQ859455, FQ859532, FQ859493, FQ859259, FQ859488, FQ859594, FQ859869 | 8     | 810         | similar to anillin, actin binding protein                                                  | <i>Monodelphis domestica</i>   | XP_001374467 | 99%      | 4.00E-23  | 28%          |
| FQ859189                                                                       | 1     | 155         | nanchung                                                                                   | <i>Tribolium castaneum</i>     | EFA04638     | 98%      | 4.00E-19  | 90%          |
| FQ859195                                                                       | 1     | 467         | similar to AGAP006254-PA                                                                   | <i>Tribolium castaneum</i>     | XP_967579    | 99%      | 2.00E-70  | 85%          |
| FQ859215                                                                       | 1     | 689         | similar to pyrazinamidase/nicotinamidase                                                   | <i>Tribolium castaneum</i>     | XP_973348    | 99%      | 6.00E-94  | 66%          |
| FQ859227                                                                       | 1     | 312         | similar to AGAP012394-PA                                                                   | <i>Tribolium castaneum</i>     | XP_967272    | 99%      | 6.00E-40  | 70%          |
| FQ859228                                                                       | 1     | 178         | GI22356                                                                                    | <i>Drosophila mojavensis</i>   | XP_002000741 | 97%      | 1.00E-13  | 63%          |
| FQ859256                                                                       | 1     | 591         | similar to CG3279-PA                                                                       | <i>Tribolium castaneum</i>     | XP_970611    | 90%      | 1.00E-75  | 82%          |
| FQ859261                                                                       | 1     | 157         | similar to proteasome beta subunit                                                         | <i>Tribolium castaneum</i>     | XP_968855    | 97%      | 2.00E-19  | 88%          |
| FQ859289                                                                       | 1     | 712         | Retrovirus-related Pol polyprotein from transposon 412                                     | <i>Drosophila melanogaster</i> | P10394       | 52%      | 1.00E-11  | 33%          |
| FQ859294                                                                       | 1     | 287         | NA                                                                                         | NA                             | NA           | NA       | NA        | NA           |
| FQ859296                                                                       | 1     | 278         | similar to CG1972 CG1972-PA                                                                | <i>Tribolium castaneum</i>     | XP_969343    | 31%      | 4.00E-05  | 75%          |
| FQ859298                                                                       | 1     | 148         | hypothetical protein EAG_03557                                                             | <i>Camponotus floridanus</i>   | EFN71375     | 97%      | 8.00E-18  | 81%          |
| FQ859320                                                                       | 1     | 284         | similar to MYC binding protein 2                                                           | <i>Tribolium castaneum</i>     | XP_971508    | 99%      | 1.00E-26  | 64%          |
| FQ859341                                                                       | 1     | 136         | hypothetical protein TcasGA2_TC013494                                                      | <i>Tribolium castaneum</i>     | EFA03494     | 59%      | 9.00E-04  | 77%          |
| FQ859343                                                                       | 1     | 193         | NA                                                                                         | NA                             | NA           | NA       | NA        | NA           |
| FQ859369                                                                       | 1     | 199         | similar to sugar transporter                                                               | <i>Tribolium castaneum</i>     | XP_967393    | 73%      | 4.00E-08  | 53%          |
| FQ859372                                                                       | 1     | 296         | similar to mitochondrial ATP synthase coupling factor 6                                    | <i>Tribolium castaneum</i>     | XP_969272    | 86%      | 3.00E-19  | 62%          |
| FQ859387                                                                       | 1     | 556         | similar to CG1440 CG1440-PC                                                                | <i>Tribolium castaneum</i>     | XP_001814047 | 37%      | 5.00E-20  | 74%          |
| FQ859400                                                                       | 1     | 102         | similar to trehalase                                                                       | <i>Tribolium castaneum</i>     | XP_973976    | 94%      | 1.00E-05  | 65%          |
| FQ859404                                                                       | 1     | 457         | Centromere protein X                                                                       | <i>Bos taurus</i>              | NP_001107999 | 49%      | 9.00E-05  | 58%          |
| FQ859418                                                                       | 1     | 231         | aspartic proteinase                                                                        | <i>Sitophilus zeamais</i>      | BAH24176     | 98%      | 6.00E-34  | 96%          |
| FQ859423                                                                       | 1     | 213         | similar to epoxide hydrolase-related                                                       | <i>Tribolium castaneum</i>     | XP_975099    | 98%      | 3.00E-15  | 49%          |
| FQ859428                                                                       | 1     | 145         | GTP-binding protein YPTC1                                                                  | <i>Trichinella spiralis</i>    | EFV59881     | 99%      | 4.00E-19  | 97%          |
| FQ859436                                                                       | 1     | 439         | GL27105                                                                                    | <i>Drosophila persimilis</i>   | XP_002027924 | 38%      | 1.00E-09  | 54%          |
| FQ859440                                                                       | 1     | 704         | similar to CG8306 CG8306-PA                                                                | <i>Tribolium castaneum</i>     | XP_973467    | 99%      | 6.00E-89  | 67%          |
| FQ859457                                                                       | 1     | 318         | hypothetical protein TcasGA2_TC011527                                                      | <i>Tribolium castaneum</i>     | EFA11369     | 76%      | 7.00E-22  | 60%          |
| FQ859474                                                                       | 1     | 603         | similar to zipper CG15792-PD myosin heavy chain 2                                          | <i>Tribolium castaneum</i>     | XP_974183    | 99%      | 5.00E-111 | 97%          |
| FQ859478                                                                       | 1     | 540         | hypothetical protein TcasGA2_TC014935                                                      | <i>Tribolium castaneum</i>     | EFA04876     | 99%      | 2.00E-78  | 81%          |
| FQ859480                                                                       | 1     | 430         | similar to restin (Reed-Steinberg cell-expressed intermediate filament-associated protein) | <i>Tribolium castaneum</i>     | XP_967018    | 93%      | 3.00E-56  | 81%          |
| FQ859503                                                                       | 1     | 118         | similar to RH56418p                                                                        | <i>Tribolium castaneum</i>     | XP_967345    | 99%      | 9.00E-12  | 92%          |
| FQ859526                                                                       | 1     | 485         | similar to mandelate racemase                                                              | <i>Tribolium castaneum</i>     | XP_972041    | 89%      | 1.00E-62  | 77%          |
| FQ859554                                                                       | 1     | 675         | hypothetical protein TcasGA2_TC006365                                                      | <i>Tribolium castaneum</i>     | EFA08694     | 60%      | 7.00E-25  | 60%          |
| FQ859576                                                                       | 1     | 547         | elongation factor 1-alpha                                                                  | <i>Sitophilus oryzae</i>       | AAN08765     | 99%      | 9.00E-97  | 95%          |
| FQ859587                                                                       | 1     | 135         | similar to presqualene diphosphate phosphatase                                             | <i>Tribolium castaneum</i>     | XP_972110    | 97%      | 5.00E-13  | 68%          |
| FQ859682                                                                       | 1     | 688         | similar to AGAP006818-PA                                                                   | <i>Tribolium castaneum</i>     | XP_969259    | 90%      | 3.00E-91  | 79%          |
| FQ859696                                                                       | 1     | 113         | similar to dynein light intermediate chain                                                 | <i>Tribolium castaneum</i>     | XP_968528    | 87%      | 2.00E-06  | 78%          |
| FQ859704                                                                       | 1     | 375         | similar to glutathione peroxidase                                                          | <i>Tribolium castaneum</i>     | XP_969937    | 84%      | 2.00E-53  | 91%          |
| FQ859733                                                                       | 1     | 372         | similar to FK506-binding protein-like protein                                              | <i>Tribolium castaneum</i>     | XP_969563    | 82%      | 3.00E-49  | 88%          |
| FQ859746                                                                       | 1     | 177         | similar to CG16708 CG16708-PA                                                              | <i>Tribolium castaneum</i>     | XP_969216    | 71%      | 2.00E-10  | 73%          |
| FQ859772                                                                       | 1     | 237         | similar to S-adenosylmethionine synthetase isoform 1                                       | <i>Tribolium castaneum</i>     | XP_966678    | 98%      | 1.00E-36  | 87%          |
| FQ859777                                                                       | 1     | 268         | similar to AGAP004510-PA                                                                   | <i>Tribolium castaneum</i>     | XP_001809545 | 98%      | 1.00E-38  | 80%          |
| FQ859781                                                                       | 1     | 252         | similar to AGAP002752-PA                                                                   | <i>Tribolium castaneum</i>     | XP_969161    | 98%      | 4.00E-23  | 59%          |
| FQ859794                                                                       | 1     | 256         | similar to AGAP010451-PA                                                                   | <i>Tribolium castaneum</i>     | XP_973021    | 96%      | 1.00E-29  | 79%          |
| FQ859812                                                                       | 1     | 106         | similar to plasma glutamate carboxypeptidase                                               | <i>Acyrtosiphon pisum</i>      | XP_001951862 | 99%      | 0.083     | 57%          |
| FQ859814                                                                       | 1     | 355         | similar to thyroid hormone receptor interactor 12 isoform 1                                | <i>Tribolium castaneum</i>     | XP_966614    | 99%      | 3.00E-56  | 95%          |
