# Supplementary material for: Host gene response to endosymbiont and pathogen in the cereal weevil Sitophilus oryzae
Source: Springer Nature journal article supplement (doi:10.1186/1471-2180-12-s1-s14), 2012-01-18
Supplement: 12866_2012_1559_MOESM4_ESM.pdf [file 12866_2012_1559_MOESM4_ESM.pdf]

**Additional file 4 – Characteristics of sequences used in transcriptomic study**

| Accession numbers                      | Reference name                | Sequence length (pb, based on the longest ORF) | 1 <sup>st</sup> blastx hit                                                                | Related species                 | Accession number | e-value | Coverage | Max identity | Interproscan domains                                                                   |
|----------------------------------------|-------------------------------|------------------------------------------------|-------------------------------------------------------------------------------------------|---------------------------------|------------------|---------|----------|--------------|----------------------------------------------------------------------------------------|
| FQ872200, FQ873253, FQ878329           | wPGRP2                        | 591                                            | peptidoglycan recognition protein 2                                                       | <i>Sitophilus zeamais</i>       | ABZ80671         | 5E-103  | 94%      | 97%          | IPR002502, IPR006619, IPR015510                                                        |
| FQ872675                               | IMD                           | 519                                            | similar to immune deficiency CG5576-PA                                                    | <i>Tribolium castaneum</i>      | XP_971829        | 3E-23   | 100%     | 39%          | IPR000488, IPR011029                                                                   |
| FQ882813                               | IAP2                          | 585                                            | similar to inhibitor of apoptosis 2 protein                                               | <i>Tribolium castaneum</i>      | XP_975027        | 9E-46   | 98%      | 55%          | IPR001370                                                                              |
| FQ861391                               | wPGRP3                        | 582                                            | similar to Tm-peptidoglycan recognition protein-SA                                        | <i>Tribolium castaneum</i>      | XP_969883        | 2E-64   | 89%      | 58%          | IPR002502, IPR006619, IPR015510, IPR017331                                             |
| FQ868488                               | GNBP1                         | 384                                            | GNBP1                                                                                     | <i>Tenebrio molitor</i>         | BAG14263         | 5E-24   | 97%      | 40%          | IPR000757, IPR008985, IPR013320                                                        |
| FQ874505, FQ879166, FQ872774           | cactus                        | 432                                            | cactus isoform 1                                                                          | <i>Tribolium castaneum</i>      | NP_001157183     | 1E-24   | 72%      | 51%          | IPR002110, IPR020683                                                                   |
| FQ871672                               | ECSIT                         | 363                                            | similar to Evolutionarily conserved signaling intermediate in Toll pathway, mitochondrial | <i>Tribolium castaneum</i>      | XP_970998        | 2E-18   | 75%      | 66%          | IPR010418                                                                              |
| FQ872701                               | Toll IP                       | 600                                            | tollip-like protein                                                                       | <i>Sitophilus zeamais</i>       | ABZ80666         | 5E-98   | 100%     | 98%          | IPR000008, IPR008973                                                                   |
| FQ880455                               | coleoptericin-A               | 378                                            | coleoptericin 1                                                                           | <i>Sitophilus zeamais</i>       | ABZ80661         | 1E-57   | 99%      | 91%          | IPR009382                                                                              |
| FQ861122                               | coleoptericin-B               | 348                                            | coleoptericin 2                                                                           | <i>Sitophilus zeamais</i>       | ABZ80667         | 2E-54   | 98%      | 96%          | IPR009382                                                                              |
| FQ870576                               | diptericin                    | 402                                            | hypothetical antimicrobial peptide                                                        | <i>Sitophilus zeamais</i>       | ABZ80662         | 1E-53   | 99%      | 93%          | IPR005521                                                                              |
| FQ870561                               | cecropin                      | 210                                            | hypothetical antimicrobial peptide                                                        | <i>Sitophilus zeamais</i>       | ABZ80668         | 2E-28   | 98%      | 91%          | noIPR                                                                                  |
| FQ882365                               | sarcotoxin                    | 588                                            | hypothetical antimicrobial peptide                                                        | <i>Sitophilus zeamais</i>       | ABZ80663         | 3E-90   | 92%      | 97%          | IPR005521                                                                              |
| FQ878880                               | c-type lysozyme               | 441                                            | c-type lysozyme                                                                           | <i>Sitophilus zeamais</i>       | ABZ80664         | 9E-78   | 99%      | 97%          | IPR001916, IPR023346                                                                   |
| FQ880527                               | TCTP                          | 612                                            | putative translationally controlled tumor protein                                         | <i>Maconellicoccus Hirsutus</i> | ABM55515         | 2E-66   | 84%      | 79%          | IPR011057, IPR011323, IPR018103, IPR018105                                             |
| FQ876170                               | IAP3                          | 366                                            | inhibitor of apoptosis                                                                    | <i>Spodoptera littoralis</i>    | CAM96614         | 4E-14   | 72%      | 55%          | IPR001370                                                                              |
| FQ872562                               | caspase-like                  | 579                                            | caspase-like protein                                                                      | <i>Tribolium castaneum</i>      | NP_001164145     | 2E-24   | 95%      | 36%          | IPR001309, IPR002398, IPR011600                                                        |
| FQ875197, FQ871532                     | MnSOD                         | 645                                            | similar to Mn superoxide dismutase                                                        | <i>Tribolium castaneum</i>      | XP_972440        | 2E-88   | 99%      | 70%          | IPR001189, IPR019831, IPR019832, IPR019833                                             |
| FQ880385, FQ871991, FQ877260           | peroxidase, peroxinectin-like | 585                                            | peroxidase                                                                                | <i>Tribolium castaneum</i>      | NP_001164313     | 1E-56   | 92%      | 55%          | IPR002007                                                                              |
| FQ859529                               | calmodulin-1                  | 410                                            | calmodulin-1                                                                              | <i>Trichinella spiralis</i>     | EFV60806         | 1E-63   | 91%      | 100%         | IPR002048, IPR011992, IPR018247, IPR018248, IPR018249                                  |
| FQ863830                               | Leonardo 14-3-3               | 534                                            | similar to 14-3-3 CG17870-PA, isoform A isoform 2                                         | <i>Apis mellifera</i>           | XP_623183        | 2E-80   | 97%      | 93%          | IPR000308, IPR023409, IPR023410                                                        |
| FQ884691                               | Ras                           | 285                                            | Ras-like protein 1                                                                        | <i>Harpegnathos saltator</i>    | EFN88166         | 9E-39   | 97%      | 97%          | IPR001806, IPR003577, IPR003578, IPR003579, IPR013753, IPR020849                       |
| FQ882388, FQ871450                     | c type lectin                 | 696                                            | similar to CG3244 CG3244-PA isoform 1                                                     | <i>Tribolium castaneum</i>      | XP_967043        | 6E-120  | 92%      | 90%          | IPR001304, IPR016186, IPR018378                                                        |
| FQ883872                               | hopscotch                     | 408                                            | hopscotch                                                                                 | <i>Tribolium castaneum</i>      | EFA07411         | 6E-47   | 94%      | 71%          | IPR000719, IPR001245, IPR008266, IPR011009, IPR020635                                  |
| FQ875934, FQ871575                     | SNARE                         | 651                                            | similar to CG3279 CG3279-PA                                                               | <i>Tribolium castaneum</i>      | XP_970611        | 5E-78   | 99%      | 74%          | IPR007705                                                                              |
| FQ874490, FQ882701                     | Hrs                           | 834                                            | similar to hepatocyte growth factor-regulated tyrosine kinase substrate                   | <i>Tribolium castaneum</i>      | XP_967857        | 4E-75   | 96%      | 67%          | IPR000306, IPR003903, IPR011011, IPR013083, IPR017455                                  |
| FQ867273                               | Rab7                          | 627                                            | similar to putative Rab7 isoform 1                                                        | <i>Nasonia vitripennis</i>      | XP_001607917     | 1E-97   | 99%      | 83%          | IPR001806, IPR002041, IPR003577, IPR003578, IPR003579, IPR005225, IPR013753, IPR020851 |
| FQ878926, FQ877422, FQ883262, FQ879701 | FK506BP                       | 1380                                           | hypothetical protein TcasGA2_TC008405                                                     | <i>Tribolium castaneum</i>      | EFA02684         | 9E-176  | 99%      | 67%          | IPR001179, IPR011990, IPR013026, IPR013105, IPR019734, IPR023566,                      |
| FQ866673                               | MEGwB                         | 390                                            | similar to allergen Aca s 13 (FABP-like protein)                                          | <i>Tribolium castaneum</i>      | XP_969762        | 0.00003 | 82%      | 32%          | IPR011038, IPR012674                                                                   |
